# Supplementary material for: Total HLA Class I Antigen Loss with the Downregulation of Antigen-Processing Machinery Components in Two Newly Established Sarcomatoid Hepatocellular Carcinoma Cell Lines
Source: Hindawi journal article supplement (doi:10.1155/2018/8363265), 2018-12-16
Supplement: f1 [file 8363265.f1.pdf]

**Supplementary Table 1. Additional  $\beta_2$ -microglobulin primers used for genomic PCR**

| Primer name  | Sequence 5'~3'             | Nucleotide position <sup>a</sup> | Amplicon size (bp) |
|--------------|----------------------------|----------------------------------|--------------------|
| B2UP-10-F    | GATCACTTGAGGTCAGGAGTT      | 14771-14791                      | 353                |
| B2UP-10-R    | TCTCTTTATGTTGCCTAGGCT      | 15103-15123                      |                    |
| B2UP-9-F     | GTTGCCCATATGTAACAGCT       | 20105-20125                      | 259                |
| B2UP-9-R     | GGTAAAATCTGTTTTGGAAC       | 20343-20363                      |                    |
| B2UP-6-F     | CCCAGGCTAGAGTGCAGTGGT      | 22721-22741                      | 218                |
| B2UP-6-R     | TACAGGCCAGGCATGGTGGCT      | 22918-22938                      |                    |
| B2UP-8-F     | CTCCAGCCTGGGTGACAGAGT      | 25002-25022                      | 337                |
| B2UP-8-R     | GGATCATGGGGGCAGATCCCT      | 25318-25338                      |                    |
| B2UP-5-F     | CCCTAGGTTTGGAAGGTCTT       | 28431-28451                      | 354                |
| B2UP-5-R     | AGCACTTTGGGAGGCCAAGGT      | 28764-28784                      |                    |
| B2UP-4-F     | AGTCTTTGCAGTCTGGGCTGT      | 29603-29623                      | 273                |
| B2UP-4-R     | CATGGCAGTGCCTCTATGAGT      | 29855-29875                      |                    |
| B2UP-1-F     | GTGGAGGCGTCTATTCAGCCA      | 31635-31655                      | 560                |
| B2UP-1-R     | CCAGCCACTCCACCCAAGGT       | 32175-32194                      |                    |
| 744-F        | CTCTAACCTGGCACTGCGTC       | 34754-34773                      | 283                |
| 468-R        | TGAG AAGGAAGTCACGGAGC      | 35018-35037                      |                    |
| 675-F        | CCCGATATTCCTCAGGTACTCCAA   | 38754-38777                      | 951                |
| 262-R        | ACCTCCATGATGCTGCTTAC       | 39685-39704                      |                    |
| 530-F        | TCCACAGGTAGCCTCTAGCAG      | 41145-41164                      | 376                |
| 512-R        | GGAGTGAGATATAAGAGATAACACAT | 41493-41518                      |                    |
| B2DO-1-F     | GGCATGAGCCACTGTGCCCT       | 43865-43885                      | 586                |
| B2DO-1-R     | AGCCTCAGGATGGTGCTAGTC      | 44430-44450                      |                    |
| B2DO-2-F     | TCCAGCCCGGGCAAGAAGAGT      | 49773-49793                      | 309                |
| B2DO-2-R     | GAGCCGGAAGTACCTCGGAGT      | 50061-50081                      |                    |
| B2DO-3-F     | CCAGATACTGGGGTCGTCCTT      | 55791-55811                      | 239                |
| B2DO-3-R     | TCTGACCTCCCATCCCGTCAG      | 56009-56029                      |                    |
| B2DO-4-F     | TTTCAGGGGCCCTTGAATCCT      | 60620-60640                      | 357                |
| B2DO-4-R     | CACTCCTTTCCAACCTCTGCCT     | 60955-60976                      |                    |
| B2DO-4-2-1-F | TCGACAGCAGCATTCGCGGTT      | 63427-63447                      | 753                |
| B2DO-4-3-R   | GTGCTCCTGTATTGGGTGCAT      | 64159-64179                      |                    |
| B2DO-4-3-F   | ATGCAGAGACACATAGGCT        | 63956-63976                      | 224                |
| B2DO-4-3-R   | GTGCTCCTGTATTGGGTGCAT      | 64159-64179                      |                    |

<sup>a</sup> Designated according to NCBI GenBank Accession AC018901
